# Supplementary material for: Alcohol Participates in the Synthesis of Functionalized Coumarin-Fused Pyrazolo[3,4-b]Pyridine from a One-Pot Three-Component Reaction
Source: MDPI journal article supplement (doi:10.3390/molecules24152835), 2019-08-04

# Alcohol Participates in the Synthesis of Functionalized Coumarin-Fused Pyrazolo[3,4-*b*]Pyridine from a One-Pot Three-Component Reaction

Wei Lin <sup>1,\*</sup>, Cangwei Zhuang <sup>1</sup>, Xiuxiu Hu <sup>1</sup>, Juanjuan Zhang <sup>2</sup> and Juxian Wang <sup>3,\*</sup>

<sup>1</sup> School of Chemistry and Environmental Engineering, Jiangsu University of Technology, Changzhou 213001, China

<sup>2</sup> State Key Laboratory of Pharmaceutical Biotechnology, Nanjing University, Nanjing 210093, China

<sup>3</sup> Institute of Medicinal Biotechnology, Chinese Academy of Medical Science and Peking Union Medical College, Beijing 100050, China

\* Correspondence: linwei@jst.edu.cn (W.L.); imbjxwang@163.com (J.-X.W.)

Academic Editor: Derek J. McPhee and Roman Dembinski

Received: 10 July 2019; Accepted: 2 August 2019; Published: 4 August 2019

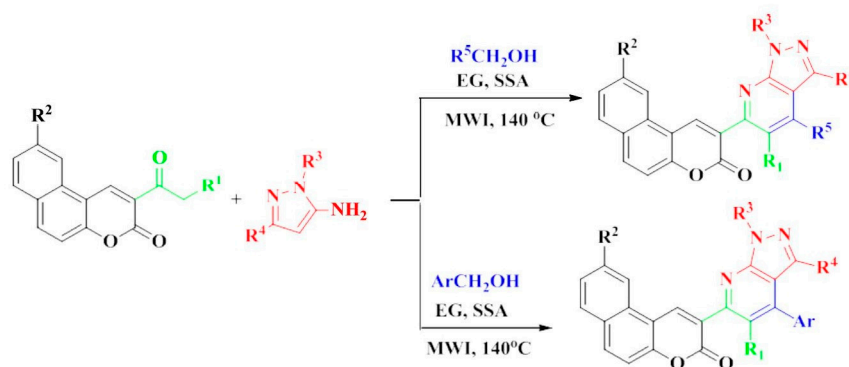

Supplement: s1 [file s1]
